# Supplementary figures and images for: A scenario for an evolutionary selection of ageing
Source: eLife journal article supplement (doi:10.7554/elife.92914), 2024-01-05

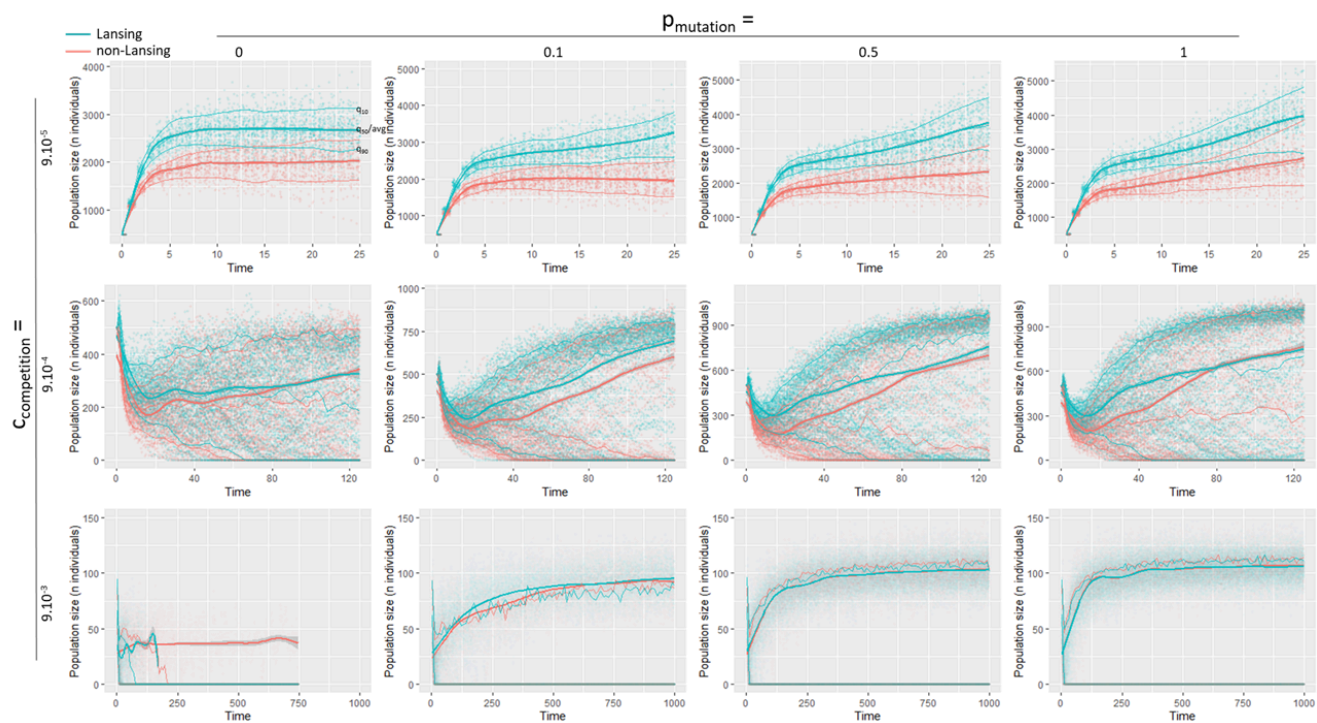

Supplement: table1-data1 [file elife-92914-table1-data1-v1.zip]
